# Supplementary material for: Unusual properties of the first copper complex containing a π(η2)-coordinated phosphorus–carbon double bond moiety
Source: Royal Society of Chemistry journal article supplement (doi:10.1039/b204144h), 2002-01-01
Supplement: b204144h.doc [file b204144h.doc]

**Supplementary Material (ESI) for Chemical Communications**

**This journal is © The Royal Society of Chemistry 2002**

**Unusual Properties of the First Copper Complex Containing a -coordinated Phosphorus-Carbon Double Bond Moiety**

Dietrich Gudat*, Martin Nieger, Katja Schmitz, Laslo Szarvas

Universität Bonn, Institut für Anorganische Chemie, Gerhard-Domagk-Str. 1, 53121 Bonn, Germany, Fax: ++49 228 734327, E-mail: dgudat@uni-bonn.de

**Supporting Information**: The experimental procedure for **2a**, details on computational studies and simulation of the solid state NMR data of **2a**.

**Experimental procedure and physical data for 2a:**

Solid CuI (190 mg, 1 mmol) was added to a solution of **1a** (790 mg, 2 mmol) in CH2Cl2 (10 mL) and the mixture stirred until nearly all of the solid had dissolved. The yellow solution was then filtered, concentrated in vacuum to a final volume of approx. 5 mL, and diluted with an equal volume of hexane. Storage of the resulting solution at 0°C produced orange crystals which were collected by filtration and dried in vacuum. – Yield 640 mg (75%), m.p. 149°C (dec), satisfactory elemental analysis. – MS (Kratos Con­cept 1H, (+)-Xe-FAB, m-NBA ma­trix): m/e = 851 [*M* - I]+, 457 [**1a** + Cu]+, 395 [**1a** + H]+; – 31P{1H} NMR (Bruker DPX 300, 121.5 MHz, CH2Cl2, –90°C): [AX]2 pattern,  = 146.3, 14.6; *J*(A,X) = 78 Hz (intra-ligand), *J*(A,A) = 105 Hz (P–M–P).

**Simulation of solid state 31P MAS NMR data for 2a:**

Spectral simulation of the observable lineshape of the isotropic lines attributable to the metal coordinated phosphorus atoms in the benzophospholide ligands of **2a** was carried out using the following approximations and procedures:

(i) As homonuclear scalar and dipolar couplings *J*(P,P) and *D*(P,P) did not give rise to observable splittings, these parameters were neglected in the simulation, allowing to decompose the spin system into two AX subspectra (A = 31P, X = 63,65Cu) which were analyzed separately;

(ii) simulation of remaining scalar and residual dipolar heteronuclear interactions requires knowledge of the following parameters: the scalar and dipolar coupling constants *J*(Cu,P) and *D*(Cu,P), the isotropic chemical shift 31P, the anisotropy of the scalar coupling *J*(Cu,P), the nuclear quadrupole coupling constant (Cu), the parameter  describing the asymmetry of the electric field gradient (efg) tensor at Cu, and the azimutal and polar angles ,  describing the orientation of the axes of the *J* and *D* tensors in the efg principal coordinate system (cf. ref. 11a, 12). Of these, *D*(63,65Cu,P) was computed from the known internuclear distances as determined by X-ray crystal structure study, the angles ,  and the asymmetry parameter  were substituted by computed values of the model compound **2b** (see below), and *J* was fixed to +750 Hz close to the experimentally determined values in the complexes [Bz3P}2Cu]X (cf. ref. 11a);

(iii) the simulation was carried out with full diagonalization of the interaction matrix as implemented in the Wsolids program;

(iv) the simulated lineshapes were convoluted with a 200 Hz gaussian broadening function whose shape and width had been determined by fitting the line attributable to the resonance of the phosphorus nuclei in the Ph3P-moieties of **2a**;

(v) the lineshapes of the 63Cu(65Cu) isotopomers were multiplied by 0.6909(0.3091) to account for the different natural isotopic abundance, and the simulated signal of the P()-site was further scaled by a factor of 0.84 to account for the influence of different T1 relaxation times prior to co-addition of all subspectra;

(vi) 31P, *J*(63,65Cu,P) and (Cu) in both subspectra were varied using a trial-and-error scheme until visual comparison yielded a reasonable agreement of experimental and simulated lineshapes;

(vii) Using the outlined procedure, a reasonable coincidence between simulation and experiment was only achieved when a negative sign of the quadrupolar coupling constant (Cu) was used, which is in contradiction with previous determinations for copper complexes of phosphines (cf. ref. 11a,b). Considering that the observed lineshape depends on the relative signs of (Cu) and the effective dipolar coupling constant *D*eff = *D* – *J*/3 (cf. ref. 11a), we resolved this discrepancy by switching the signs of both parameters, setting (Cu) > 0 and recomputing *J* = +6200 Hz to yield *D*eff < 0. It should be noted that experimentally no distinction between the two different values of *J* is feasible; the smaller of two possible values in ref. 11a was purely chosen under the consideration that this choice appeared more likely.

(viii) In order to estimate the reliability of the final values of 31P and *J*(63,65Cu,P), the whole procedure was repeated with different combinations of (Cu) and *J*, respectively. The results revealed that despite remaining ambiguities in (Cu) and *J* (whose values are only included in the following table to assure the reproducibility of the simulations), variations of 31P by more than ±0.05 and *J*(63,65Cu,P) by more than ±20 Hz resulted in significant deviations of experimental and simulated lineshapes, rendering the values of these parameters satisfactorily reliable.

As a result of the above described procedure, the following best-fit parameter sets were obtained and used to produce the simulated spectrum depicted in Fig. 2:

|  | Site 1: 1(P)-bound | Site 2: 2(P=C) bound |
| --- | --- | --- |
| 31P | 149.46±0.05 | 153.83±0.05 |
| 1*J*(63,65Cu,P) | 1460/1564±20 Hz | 125/134±20 Hz |
| *J*(63,65Cu,P) | 6200/6690 Hz | |
| 1*D*(63,65Cu,P) | 1166/1249 Hz | 913/977 Hz |
| (63,65Cu) | 64/57 MHz | |
|  | 0.6 | |
|  | 52° | 28° |
|  | 99° | 66° |

**Details and results of computational studies:**

All DFT-computations were performed with the B3LYP functional and using an "ultrafine" grid for numeric integration. Energy optimizations, frequency calculations, and NBO analyses were carried using a mixed 6-31g (at H, C, P, Cu)/SDD (at I) basis set (Bas I) with relativistic pseudo potentials at I and one set of additional polarization functions on all heavy atoms. The same molecular geometries and basis sets were also used for the CDA computations; however, in this case, the atomic numbering schemes had to be changed in order to comply to the needs of the CDA program (cf. ref. 15).

Nuclear magnetic shieldings and electrostatic properties (orientation and magnitude of the efg tensor) of 2b were computed using a SDD basis with pseudo potentials at I and a 6-311g(d,f) basis at H, C, P, Cu which was further augmented by a second set of d and f polarization functions at the metal coordinated phosphorus atoms (Bas II). These calculations were performed using both the molecular geometry obtained from previous energy optimization at the lower level of sophistication and the "experimental" molecular geometry. The latter is defined by coordinates from the X-ray structure data of 2a for the heteroatom skeleton; CH hydrogen atoms were attached at the observed bond angles and standard distances of 1.09 Å, and PH hydrogen atoms were introduced by replacing the adjacent carbon atoms of the phenyl groups by hydrogen atoms whose distance was then fixed at 1.42 Å. The computed isotropic absolute nuclear magnetic shielding values iso were converted into chemical shifts iso using the reference data by Jameson *et al.* (C.J. Jameson, A. De Dios, A.K. Jameson, *Chem. Phys. Lett.* 1990,  *167*, 574). The chemical shieldings of the free ligand 1a necessary for the computation of coordination shifts were determined using previously determined molecular geometries (ref. 8), and the same basis set as described above.

Coordinates (in Å), absolute energies (in Hartree), and zero-point energies (zpe, in Hartree) of the model complexes [{2()-1b}{1(P)-1b}CuI] (**2b**), [{1(P)-1b}2CuI], and [{2()-1b}2 CuI] after energy optimization of molecular geometries (frequency analyses show all molecules to represent local minima on the energy hypersurface that have no imaginary vibrations):

| [{2()-1b}{1(P)-1b}CuI] (2b) | | | |
| --- | --- | --- | --- |
| I | -2.036185 | -2.986129 | -0.075942 |
| Cu | -1.218501 | -0.566023 | -0.016172 |
| P | 0.893404 | -0.232101 | -0.666416 |
| C | 2.234325 | -1.334390 | -0.264275 |
| C | 1.935434 | 1.138988 | -0.629310 |
| H | 1.607971 | 2.147667 | -0.857351 |
| C | 3.473539 | -0.625175 | -0.157687 |
| C | 3.288398 | 0.788154 | -0.372426 |
| C | 4.412838 | 1.648882 | -0.310120 |
| H | 4.278574 | 2.714412 | -0.483366 |
| H | 4.769712 | -1.119535 | 0.113932 |
| H | 4.930188 | -2.184653 | 0.276375 |
| C | 5.666820 | 1.136821 | -0.037822 |
| H | 6.526810 | 1.799629 | 0.008341 |
| C | 5.844702 | -0.250494 | 0.175863 |
| H | 6.838383 | -0.637014 | 0.386359 |
| P | 2.008100 | -3.037282 | -0.149941 |
| H | 2.594384 | -3.850950 | -1.150732 |
| H | 0.624916 | -3.346877 | -0.164765 |
| H | 2.537774 | -3.648020 | 1.009797 |
| P | -1.938611 | 0.876249 | 1.684586 |
| C | -2.644932 | 0.955179 | 0.072763 |
| H | -3.550284 | 0.416049 | -0.194686 |
| C | -1.040661 | 2.395196 | 1.371163 |
| C | -2.270596 | 2.151601 | -0.637481 |
| C | -1.322254 | 2.955694 | 0.076089 |
| C | -2.720175 | 2.570765 | -1.907754 |
| H | -3.448304 | 1.966023 | -2.442432 |
| C | -0.823496 | 4.133995 | -0.521237 |
| H | -0.102013 | 4.759641 | 0.003047 |
| C | -2.226506 | 3.737272 | -2.467925 |
| H | -2.570129 | 4.057146 | -3.447574 |
| C | -1.273358 | 4.514343 | -1.776272 |
| H | -0.892902 | 5.425552 | -2.230077 |
| P | 0.238584 | 2.872932 | 2.400168 |
| H | 0.193344 | 2.143349 | 3.596176 |
| H | 0.261128 | 4.221656 | 2.827414 |
| H | 1.579574 | 2.715151 | 1.966418 |
| Energy (Bas I) | -3636.40563834 | | |
| zpe (Bas I) | 0.266131 | | |
| Energy (Bas II) | -3636.83994198 | | |

| [{1(P)-**1b**}2CuI] | | | |
| --- | --- | --- | --- |
| I | 0. | 0. | 3.0400440015 |
| Cu | 0. | 0. | 0.4922951692 |
| C | 0.6877209744 | 4.3521363176 | -3.5235644687 |
| C | 0.3429682091 | 3.6500903812 | -2.3416755976 |
| C | 0.2922514195 | 4.3617060995 | -1.0895928163 |
| C | 0.5795923427 | 5.7455693086 | -1.0687196726 |
| C | 0.9166525657 | 6.3995950553 | -2.2401107235 |
| C | 0.9713023344 | 5.7024665954 | -3.4705469889 |
| C | 0.0301199039 | 2.2719992397 | -2.2124683412 |
| P | -0.3780998105 | 1.8359497899 | -0.6002174368 |
| C | -0.0597695963 | 3.4901795639 | -0.0104344024 |
| P | -0.2357849087 | 3.9155192204 | 1.6415656223 |
| H | 0.0103885297 | 1.5843623789 | -3.050790891 |
| H | 0.7273463406 | 3.8157694183 | -4.4684756519 |
| H | 0.5396693554 | 6.3035190297 | -0.1339243294 |
| H | 1.2365224509 | 6.2388190891 | -4.3775219536 |
| H | 1.1403184876 | 7.4629121381 | -2.2172441841 |
| H | 0.8456872534 | 4.6246887928 | 2.2113216408 |
| H | -0.3800415475 | 2.7574046977 | 2.4299648747 |
| H | -1.3131875636 | 4.7529216535 | 2.0296797836 |
| C | -0.6877209744 | -4.3521363176 | -3.5235644687 |
| C | -0.3429682091 | -3.6500903812 | -2.3416755976 |
| C | -0.2922514195 | -4.3617060995 | -1.0895928163 |
| C | -0.5795923427 | -5.7455693086 | -1.0687196726 |
| C | -0.9166525657 | -6.3995950553 | -2.2401107235 |
| C | -0.9713023344 | -5.7024665954 | -3.4705469889 |
| C | -0.0301199039 | -2.2719992397 | -2.2124683412 |
| P | 0.3780998105 | -1.8359497899 | -0.6002174368 |
| C | 0.0597695963 | -3.4901795639 | -0.0104344024 |
| P | 0.2357849087 | -3.9155192204 | 1.6415656223 |
| H | -0.0103885297 | -1.5843623789 | -3.050790891 |
| H | -0.7273463406 | -3.8157694183 | -4.4684756519 |
| H | -0.5396693554 | -6.3035190297 | -0.1339243294 |
| H | -1.2365224509 | -6.2388190891 | -4.3775219536 |
| H | -1.1403184876 | -7.4629121381 | -2.2172441841 |
| H | -0.8456872534 | -4.6246887928 | 2.2113216408 |
| H | 0.3800415475 | -2.7574046977 | 2.4299648747 |
| H | 1.3131875636 | -4.7529216535 | 2.0296797836 |
| Energy (Bas I) | -3636.40579015 | | |
| zpe (Bas I) | 0.266207 | | |

| [{2()-**1b**}2CuI] | | | |
| --- | --- | --- | --- |
| I | 0. | 0. | -1.9724142983 |
| Cu | 0. | 0. | 0.636606273 |
| P | 2.1059736904 | -0.9540105333 | 1.3089030596 |
| C | 1.5498419625 | 0.5931527034 | 1.9392439582 |
| C | 2.2923838565 | 1.7061114839 | 1.4042730346 |
| C | 3.2365667362 | 1.316790429 | 0.4003508727 |
| C | 3.2650810548 | -0.1122217194 | 0.2340480535 |
| C | 3.9987111645 | 2.309600117 | -0.2530449435 |
| C | 3.8448272116 | 3.6405830323 | 0.0993076301 |
| C | 2.932828838 | 4.0219099964 | 1.1069457507 |
| C | 2.1637976904 | 3.0679673703 | 1.7511428984 |
| H | 1.0390853655 | 0.6939795487 | 2.8936593753 |
| P | 3.8823950205 | -0.9149754908 | -1.1476344534 |
| H | 4.7192005849 | 2.0375095662 | -1.0229105797 |
| H | 4.4377237687 | 4.4008200948 | -0.4024241111 |
| H | 2.8338345283 | 5.0707987404 | 1.3724328661 |
| H | 1.4536186217 | 3.3586801979 | 2.5215720268 |
| H | 5.2637690446 | -0.7583500179 | -1.4132306435 |
| H | 3.3198581174 | -0.643023529 | -2.4171248565 |
| H | 3.7327084223 | -2.3011731917 | -1.0064187498 |
| P | -2.1059736904 | 0.9540105333 | 1.3089030596 |
| C | -1.5498419625 | -0.5931527034 | 1.9392439582 |
| C | -2.2923838565 | -1.7061114839 | 1.4042730346 |
| C | -3.2365667362 | -1.316790429 | 0.4003508727 |
| C | -3.2650810548 | 0.1122217194 | 0.2340480535 |
| C | -3.9987111645 | -2.309600117 | -0.2530449435 |
| C | -3.8448272116 | -3.6405830323 | 0.0993076301 |
| C | -2.932828838 | -4.0219099964 | 1.1069457507 |
| C | -2.1637976904 | -3.0679673703 | 1.7511428984 |
| H | -1.0390853655 | -0.6939795487 | 2.8936593753 |
| P | -3.8823950205 | 0.9149754908 | -1.1476344534 |
| H | -4.7192005849 | -2.0375095662 | -1.0229105797 |
| H | -4.4377237687 | -4.4008200948 | -0.4024241111 |
| H | -2.8338345283 | -5.0707987404 | 1.3724328661 |
| H | -1.4536186217 | -3.3586801979 | 2.5215720268 |
| H | -5.2637690446 | 0.7583500179 | -1.4132306435 |
| H | -3.3198581174 | 0.643023529 | -2.4171248565 |
| H | -3.7327084223 | 2.3011731917 | -1.0064187498 |
| Energy (Bas I) | -3636.40629296 | | |
| zpe (Bas I) | 0.266390 | | |
